# Supplementary material for: The Combined Effect of Atmospheric and Solar Activity Forcings on the Hydroclimate in Southeastern Europe
Source: MDPI journal article supplement (doi:10.3390/atmos14111622), 2023-10-29
Supplement: s1 [file s1]

Archive with 1 entries (1 files):
- atmosphere-2644982-supplementary.pdf
